# Supplementary material for: Self-assembled hierarchical porous NiMn2O4 microspheres as high performance Li-ion battery anodes
Source: Royal Society of Chemistry journal article supplement (doi:10.1039/c8ra08080a), 2018-01-01
Supplement: c8ra08080a1.pdf [file c8ra08080a1.pdf]

*Supporting information to*

**Self-assembled hierarchical porous NiMn<sub>2</sub>O<sub>4</sub>  
microspheres as high performance Li-ion battery anode**

Shuang Zhao,<sup>a</sup> Honglei Li,<sup>a</sup> Zhixu Jian,<sup>a</sup> Yalan Xing,<sup>\*a</sup> and Shichao Zhang<sup>\*a</sup>

*School of Materials Science and Engineering, Beihang University, Beijing 100191,*

*PR China;*

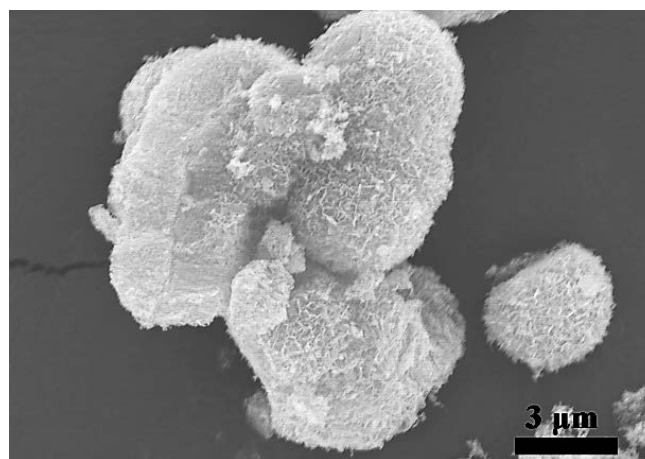

Fig. S1 SEM image of NMO-600

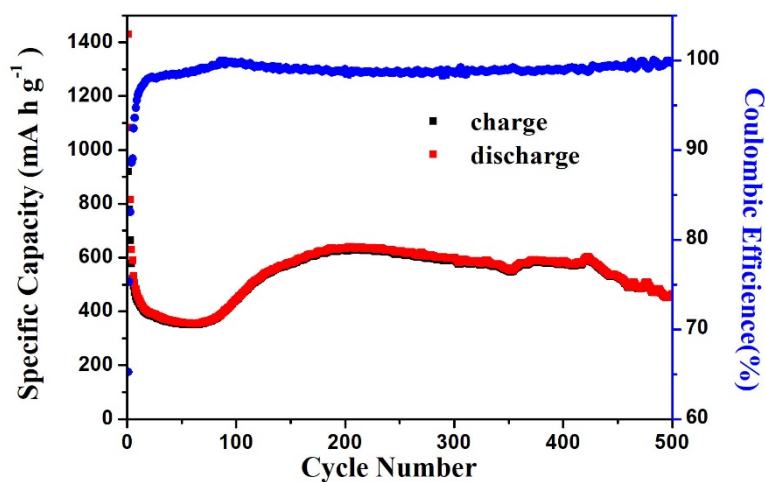

Fig. S2 Cycling performance of NMO-600 at a current density of 500 mA g<sup>-1</sup>.
